# Supplementary material for: Intensified ambulatory cardiology care: effects on mortality and hospitalisation—a comparative observational study
Source: Springer Nature journal article supplement (doi:10.1038/s41598-020-71770-9), 2020-09-07
Supplement: MOESM1 [file 41598_2020_71770_MOESM1_ESM.pdf]

# **Intensified ambulatory cardiology care: effects on mortality and hospitalisation – a comparative observational study**

**Olga A. Sawicki<sup>1,\*</sup>, Angelina Mueller<sup>1</sup>, Anastasiya Glushan<sup>1</sup>, Thorben Breitzkreuz<sup>2</sup>, Felix S. Wicke<sup>1</sup>, Kateryna Karimova<sup>1</sup>, Ferdinand M. Gerlach<sup>1</sup>, Michel Wensing<sup>3</sup>, Norbert Smetak<sup>4</sup>, Ralph F. Bosch<sup>5,+</sup> and Martin Beyer<sup>1,+</sup>**

<sup>1</sup>Institute of General Practice, Goethe University, Theodor-Stern-Kai 7, Frankfurt, 60590, Germany

<sup>2</sup>aQua, Institute for Applied Quality Improvement and Research in Health Care, 37073 Goettingen, Germany

<sup>3</sup>Department of General Practice and Health Services Research, University Hospital Heidelberg, Germany

<sup>4</sup>Cardiology practice, Kirchheim, 73230, Germany

<sup>5</sup>Cardio Centre Ludwigsburg-Bietigheim, Ludwigsburg, 71634, Germany

\*Corresponding author. Tel: + 49 69 6301 6476, Fax: + 49 69 6301 6428, E-mail address:

[sawicki@allgemeinmedizin.uni-frankfurt.de](mailto:sawicki@allgemeinmedizin.uni-frankfurt.de)

+these authors contributed equally to this work

**Supplementary Table S1. Definition of covariates**

CAD, coronary artery disease; CHF, chronic heart failure; COPD, chronic obstructive pulmonary disease; CVD, cardiovascular disease; DMP, disease management programme; DM, diabetes mellitus.

| Covariate               | Operationalisation                                                                                                                                               |
|-------------------------|------------------------------------------------------------------------------------------------------------------------------------------------------------------|
| Age                     | Age on January 1, 2015. Age-groups used for adjustment: 18-40, 41-50, 51-60, 61-70, 71-80, 81-90, $\geq 91$                                                      |
| Sex                     | Male/female on January 1, 2015                                                                                                                                   |
| German nationality      | Yes/no on January 1, 2015                                                                                                                                        |
| Living in urban area    | Yes/no                                                                                                                                                           |
| Employed                | Yes/no on January 1, 2015                                                                                                                                        |
| State of hardship       | Yes/no                                                                                                                                                           |
| In need of nursing care | Registered need for nursing care or no need of nursing care on January 1, 2015                                                                                   |
| Nursing home residence  | Residing in nursing home or not residing in nursing home on January 1, 2015                                                                                      |
| DMP CAD                 | Yes/no                                                                                                                                                           |
| DMP DM                  | Yes/no                                                                                                                                                           |
| CVD hospitalisation     | Yes/no. Hospitalisation in the year 2014 for any condition in ICD-10 chapter IX                                                                                  |
| Influenza vaccination   | Yes/no. Influenza vaccination in quarters 3 or 4 of the year 2014 or quarter 1 of 2015 and in quarters 3 or 4 of the year 2015 or quarter 1 of 2016 respectively |
| Charlson index          | Range, 0-37; based on diagnosed comorbidities in the year 2014, calculated according to Sundararajan et al. <sup>34</sup>                                        |
| NYHA class              | 0 to IV of the New York Heart Association Grade of Heart Failure, based on ICD-10 codes in the year 2014. Used only for the CHF cohort                           |
| Comorbid condition      | For all comorbid conditions: at least two outpatient diagnoses in two different quarters of one year, or one inpatient diagnosis, was required                   |
| Diabetes mellitus       | ICD-10: E10, E11                                                                                                                                                 |
| Hyperlipidaemia         | ICD-10: E78                                                                                                                                                      |
| Renal failure           | ICD-10: N18.2, N18.3, N18.4, N18.5, N18.8, N18.9                                                                                                                 |
| COPD                    | ICD-10: J44                                                                                                                                                      |
| Pneumonia               | ICD-10: J12-J18, U69.00, A40.3, J86, B95.3                                                                                                                       |
| Depression              | ICD-10: F32, F33                                                                                                                                                 |
| Hypertension            | ICD-10: I10-I15                                                                                                                                                  |
| CHF                     | ICD-10: I50                                                                                                                                                      |
| CAD                     | ICD-10: I20-I25                                                                                                                                                  |
| Atrial fibrillation     | ICD-10: I48                                                                                                                                                      |
| Other arrhythmias       | ICD-10: I42.80, I44-I47, I49, Q24.6                                                                                                                              |
| Valvular heart disease  | ICD-10: I05-I08, I34-I39, Q20-26                                                                                                                                 |
| Myocardial infarction   | ICD-10: I21, I22, I25.2                                                                                                                                          |

**Supplementary Table S2. Multivariable-adjusted Cox regression models for all-cause mortality in CHF patients enrolled in the cardiology care programme versus control group**

CAD, coronary artery disease; CHF, chronic heart failure; COPD, chronic obstructive pulmonary disease; CVD, cardiovascular disease; DMP, disease management programme; DM, diabetes mellitus.

| Variables               | Interpretation                                 | Hazard Ratio | Lower 95% CI | Upper 95% CI | p-value |
|-------------------------|------------------------------------------------|--------------|--------------|--------------|---------|
| Group                   | Cardiology care programme versus control group | 0.840        | 0.774        | 0.911        | <0.0001 |
| Age                     | 18-40 versus 41-50 years                       | 0.948        | 0.358        | 2.505        | 0.9135  |
| Age                     | 51-60 versus 41-50 years                       | 0.991        | 0.617        | 1.594        | 0.9716  |
| Age                     | 61-70 versus 41-50 years                       | 1.513        | 0.974        | 2.352        | 0.0656  |
| Age                     | 71-80 versus 41-50 years                       | 2.023        | 1.310        | 3.124        | 0.0015  |
| Age                     | 81-90 versus 41-50 years                       | 3.431        | 2.219        | 5.304        | <0.0001 |
| Age                     | 91+ versus 41-50 years                         | 5.351        | 3.393        | 8.440        | <0.0001 |
| Sex                     | Male versus female                             | 1.567        | 1.446        | 1.698        | <0.0001 |
| German nationality      | No versus yes                                  | 0.870        | 0.739        | 1.025        | 0.0960  |
| Living in urban area    | No versus yes                                  | 1.047        | 0.972        | 1.127        | 0.2245  |
| Employed                | Yes versus no                                  | 0.737        | 0.615        | 0.883        | 0.0009  |
| State of hardship       | Yes versus no                                  | 1.046        | 0.965        | 1.134        | 0.2758  |
| In need of nursing care | Yes versus no                                  | 2.419        | 2.212        | 2.645        | <0.0001 |
| Nursing home resident   | Yes versus no                                  | 1.670        | 1.426        | 1.956        | <0.0001 |
| DMP CAD                 | Yes versus no                                  | 0.933        | 0.849        | 1.026        | 0.1524  |
| DMP DM                  | Yes versus no                                  | 1.009        | 0.905        | 1.125        | 0.8728  |
| CVD hospitalisation     | Yes versus no                                  | 1.070        | 0.980        | 1.168        | 0.1326  |
| Influenza vaccination   | No versus yes                                  | 1.137        | 1.056        | 1.225        | 0.0007  |
| Charlson index          | Per point                                      | 1.112        | 1.092        | 1.133        | <0.0001 |
| NYHA class              | Class II versus I                              | 0.974        | 0.806        | 1.176        | 0.7829  |
| NYHA class              | Class III versus I                             | 1.456        | 1.217        | 1.741        | <0.0001 |
| NYHA class              | Class IV versus I                              | 1.852        | 1.527        | 2.246        | <0.0001 |
| NYHA class              | No NYHA class versus class I                   | 1.250        | 1.045        | 1.495        | 0.0148  |
| Diabetes mellitus       | Yes versus no                                  | 0.918        | 0.826        | 1.021        | 0.1154  |
| Hyperlipidaemia         | Yes versus no                                  | 0.848        | 0.783        | 0.918        | <0.0001 |
| Renal failure           | Yes versus no                                  | 1.244        | 1.139        | 1.359        | <0.0001 |
| COPD                    | Yes versus no                                  | 1.079        | 0.992        | 1.175        | 0.0776  |
| Pneumonia               | Yes versus no                                  | 1.188        | 1.066        | 1.324        | 0.0018  |
| Depression              | Yes versus no                                  | 0.938        | 0.858        | 1.024        | 0.1530  |
| Hypertension            | Yes versus no                                  | 0.777        | 0.675        | 0.895        | 0.0005  |
| CAD                     | Yes versus no                                  | 0.949        | 0.864        | 1.044        | 0.2815  |
| Atrial fibrillation     | Yes versus no                                  | 1.237        | 1.144        | 1.338        | <0.0001 |
| Other arrhythmias       | Yes versus no                                  | 0.930        | 0.863        | 1.002        | 0.0566  |
| Valvular heart disease  | Yes versus no                                  | 1.112        | 1.031        | 1.199        | 0.0058  |
| Myocardial infarction   | Yes versus no                                  | 1.021        | 0.928        | 1.124        | 0.6721  |

**Supplementary Table S3. Multivariable-adjusted Cox regression models for all-cause mortality in CAD patients enrolled in the cardiology care programme versus control group**

CAD, coronary artery disease; CHF, chronic heart failure; COPD, chronic obstructive pulmonary disease; CVD, cardiovascular disease; DMP, disease management programme; DM, diabetes mellitus.

| Variables               | Interpretation                                 | Hazard Ratio | Lower 95% CI | Upper 95% CI | p-value |
|-------------------------|------------------------------------------------|--------------|--------------|--------------|---------|
| Group                   | Cardiology care programme versus control group | 0.814        | 0.756        | 0.878        | <0.0001 |
| Age                     | 18-40 versus 41-50 years                       | 1.300        | 0.388        | 4.360        | 0.6711  |
| Age                     | 51-60 versus 41-50 years                       | 1.042        | 0.648        | 1.678        | 0.8645  |
| Age                     | 61-70 versus 41-50 years                       | 1.787        | 1.142        | 2.796        | 0.0110  |
| Age                     | 71-80 versus 41-50 years                       | 2.568        | 1.647        | 4.004        | <0.0001 |
| Age                     | 81-90 versus 41-50 years                       | 4.501        | 2.881        | 7.033        | <0.0001 |
| Age                     | 91+ versus 41-50 years                         | 8.729        | 5.471        | 13.93        | <0.0001 |
| Sex                     | Male versus female                             | 1.596        | 1.476        | 1.725        | <0.0001 |
| German nationality      | No versus yes                                  | 0.887        | 0.771        | 1.020        | 0.0929  |
| Living in urban area    | No versus yes                                  | 1.012        | 0.944        | 1.085        | 0.7398  |
| Employed                | Yes versus no                                  | 0.794        | 0.676        | 0.933        | 0.0049  |
| State of hardship       | Yes versus no                                  | 1.126        | 1.043        | 1.215        | 0.0024  |
| In need of nursing care | Yes versus no                                  | 2.620        | 2.403        | 2.857        | <0.0001 |
| Nursing home resident   | Yes versus no                                  | 1.547        | 1.290        | 1.856        | <0.0001 |
| DMP CAD                 | Yes versus no                                  | 0.863        | 0.799        | 0.933        | 0.0002  |
| DMP DM                  | Yes versus no                                  | 0.999        | 0.901        | 1.108        | 0.9883  |
| CVD hospitalisation     | Yes versus no                                  | 1.069        | 0.986        | 1.158        | 0.1041  |
| Influenza vaccination   | No versus yes                                  | 1.164        | 1.085        | 1.250        | <0.0001 |
| Charlson index          | Per point                                      | 1.141        | 1.121        | 1.161        | <0.0001 |
| Diabetes mellitus       | Yes versus no                                  | 0.907        | 0.821        | 1.003        | 0.0567  |
| Hyperlipidaemia         | Yes versus no                                  | 0.867        | 0.803        | 0.936        | 0.0002  |
| Renal failure           | Yes versus no                                  | 1.222        | 1.122        | 1.330        | <0.0001 |
| COPD                    | Yes versus no                                  | 1.149        | 1.058        | 1.247        | 0.0010  |
| Pneumonia               | Yes versus no                                  | 1.249        | 1.117        | 1.397        | <0.0001 |
| Depression              | Yes versus no                                  | 0.940        | 0.864        | 1.022        | 0.1492  |
| Hypertension            | Yes versus no                                  | 0.852        | 0.744        | 0.976        | 0.0208  |
| CHF                     | Yes versus no                                  | 1.274        | 1.175        | 1.382        | <0.0001 |
| Atrial fibrillation     | Yes versus no                                  | 1.294        | 1.200        | 1.396        | <0.0001 |
| Other arrhythmias       | Yes versus no                                  | 0.973        | 0.905        | 1.047        | 0.4717  |
| Valvular heart disease  | Yes versus no                                  | 1.130        | 1.050        | 1.217        | 0.0011  |
| Myocardial infarction   | Yes versus no                                  | 1.044        | 0.967        | 1.128        | 0.2704  |

**Supplementary Table S4. Multivariable-adjusted negative binomial regression models for all-cause hospitalisation in CHF patients enrolled in the cardiology care programme versus control group**  
 CAD, coronary artery disease; CHF, chronic heart failure; COPD, chronic obstructive pulmonary disease; CVD, cardiovascular disease; DMP, disease management programme; DM, diabetes mellitus.

| Variables               | Interpretation                                 | Rate Ratio | Lower 95% CI | Upper 95% CI | p-value |
|-------------------------|------------------------------------------------|------------|--------------|--------------|---------|
| Group                   | Cardiology care programme versus control group | 0.935      | 0.898        | 0.973        | 0.0009  |
| Age                     | 18-40 versus 41-50 years                       | 0.982      | 0.758        | 1.272        | 0.8910  |
| Age                     | 51-60 versus 41-50 years                       | 1.012      | 0.889        | 1.152        | 0.8572  |
| Age                     | 61-70 versus 41-50 years                       | 1.023      | 0.902        | 1.160        | 0.7210  |
| Age                     | 71-80 versus 41-50 years                       | 1.166      | 1.029        | 1.321        | 0.0158  |
| Age                     | 81-90 versus 41-50 years                       | 1.260      | 1.109        | 1.432        | 0.0004  |
| Age                     | 91+ versus 41-50 years                         | 1.186      | 0.990        | 1.421        | 0.0641  |
| Sex                     | Male versus female                             | 1.167      | 1.123        | 1.213        | <0.0001 |
| German nationality      | No versus yes                                  | 0.916      | 0.858        | 0.978        | 0.0086  |
| Living in urban area    | No versus yes                                  | 1.012      | 0.976        | 1.049        | 0.5164  |
| Employed                | Yes versus no                                  | 0.879      | 0.823        | 0.938        | 0.0001  |
| State of hardship       | Yes versus no                                  | 1.556      | 1.496        | 1.617        | <0.0001 |
| In need of nursing care | Yes versus no                                  | 1.343      | 1.273        | 1.417        | <0.0001 |
| Nursing home resident   | Yes versus no                                  | 0.991      | 0.850        | 1.155        | 0.9045  |
| DMP CAD                 | Yes versus no                                  | 1.001      | 0.957        | 1.048        | 0.9503  |
| DMP DM                  | Yes versus no                                  | 1.005      | 0.949        | 1.064        | 0.8706  |
| CVD hospitalisation     | Yes versus no                                  | 1.280      | 1.225        | 1.336        | <0.0001 |
| Influenza vaccination   | No versus yes                                  | 1.038      | 1.001        | 1.077        | 0.0436  |
| Charlson index          | Per point                                      | 1.077      | 1.066        | 1.088        | <0.0001 |
| NYHA class              | Class II versus I                              | 1.013      | 0.944        | 1.087        | 0.7251  |
| NYHA class              | Class III versus I                             | 1.224      | 1.140        | 1.315        | <0.0001 |
| NYHA class              | Class IV versus I                              | 1.405      | 1.288        | 1.533        | <0.0001 |
| NYHA class              | No NYHA class versus class I                   | 1.099      | 1.025        | 1.179        | 0.0081  |
| Diabetes mellitus       | Yes versus no                                  | 0.941      | 0.891        | 0.994        | 0.0307  |
| Hyperlipidaemia         | Yes versus no                                  | 0.937      | 0.901        | 0.975        | 0.0013  |
| Renal failure           | Yes versus no                                  | 1.178      | 1.125        | 1.235        | <0.0001 |
| COPD                    | Yes versus no                                  | 1.152      | 1.102        | 1.204        | <0.0001 |
| Pneumonia               | Yes versus no                                  | 1.231      | 1.150        | 1.318        | <0.0001 |
| Depression              | Yes versus no                                  | 1.049      | 1.005        | 1.094        | 0.0289  |
| Hypertension            | Yes versus no                                  | 1.001      | 0.936        | 1.071        | 0.9683  |
| CAD                     | Yes versus no                                  | 1.035      | 0.987        | 1.084        | 0.1568  |
| Atrial fibrillation     | Yes versus no                                  | 1.227      | 1.181        | 1.275        | <0.0001 |
| Other arrhythmias       | Yes versus no                                  | 0.988      | 0.952        | 1.025        | 0.5099  |
| Valvular heart disease  | Yes versus no                                  | 1.042      | 1.005        | 1.082        | 0.0266  |
| Myocardial infarction   | Yes versus no                                  | 1.038      | 0.990        | 1.089        | 0.1268  |

**Supplementary Table S5. Multivariable-adjusted negative binomial regression models for all-cause hospitalisation in CAD patients enrolled in the cardiology care programme versus control group**  
 CAD, coronary artery disease; CHF, chronic heart failure; COPD, chronic obstructive pulmonary disease; CVD, cardiovascular disease; DMP, disease management programme; DM, diabetes mellitus.

| Variables               | Interpretation                                 | Rate Ratio | Lower 95% CI | Upper 95% CI | p-value |
|-------------------------|------------------------------------------------|------------|--------------|--------------|---------|
| Group                   | Cardiology care programme versus control group | 0.943      | 0.914        | 0.973        | 0.0002  |
| Age                     | 18-40 versus 41-50 years                       | 1.394      | 1.069        | 1.818        | 0.0143  |
| Age                     | 51-60 versus 41-50 years                       | 1.182      | 1.067        | 1.311        | 0.0014  |
| Age                     | 61-70 versus 41-50 years                       | 1.220      | 1.102        | 1.350        | 0.0001  |
| Age                     | 71-80 versus 41-50 years                       | 1.381      | 1.247        | 1.529        | <0.0001 |
| Age                     | 81-90 versus 41-50 years                       | 1.518      | 1.365        | 1.687        | <0.0001 |
| Age                     | 91+ versus 41-50 years                         | 1.809      | 1.530        | 2.138        | <0.0001 |
| Sex                     | Male versus female                             | 1.153      | 1.117        | 1.190        | <0.0001 |
| German nationality      | No versus yes                                  | 0.883      | 0.840        | 0.927        | <0.0001 |
| Living in urban area    | No versus yes                                  | 1.012      | 0.983        | 1.042        | 0.4255  |
| Employed                | Yes versus no                                  | 0.951      | 0.904        | 1.000        | 0.0509  |
| State of hardship       | Yes versus no                                  | 1.602      | 1.552        | 1.654        | <0.0001 |
| In need of nursing care | Yes versus no                                  | 1.370      | 1.303        | 1.440        | <0.0001 |
| Nursing home resident   | Yes versus no                                  | 0.865      | 0.726        | 1.032        | 0.1079  |
| DMP CAD                 | Yes versus no                                  | 0.976      | 0.946        | 1.007        | 0.1329  |
| DMP DM                  | Yes versus no                                  | 0.962      | 0.918        | 1.009        | 0.1142  |
| CVD hospitalisation     | Yes versus no                                  | 1.308      | 1.263        | 1.354        | <0.0001 |
| Influenza vaccination   | No versus yes                                  | 1.077      | 1.045        | 1.110        | <0.0001 |
| Charlson index          | Per point                                      | 1.095      | 1.085        | 1.104        | <0.0001 |
| Diabetes mellitus       | Yes versus no                                  | 0.961      | 0.918        | 1.006        | 0.0899  |
| Hyperlipidaemia         | Yes versus no                                  | 0.986      | 0.954        | 1.019        | 0.3892  |
| Renal failure           | Yes versus no                                  | 1.131      | 1.086        | 1.179        | <0.0001 |
| COPD                    | Yes versus no                                  | 1.162      | 1.118        | 1.207        | <0.0001 |
| Pneumonia               | Yes versus no                                  | 1.265      | 1.185        | 1.351        | <0.0001 |
| Depression              | Yes versus no                                  | 1.091      | 1.053        | 1.130        | <0.0001 |
| Hypertension            | Yes versus no                                  | 1.096      | 1.040        | 1.155        | 0.0007  |
| CHF                     | Yes versus no                                  | 1.041      | 1.007        | 1.077        | 0.0168  |
| Atrial fibrillation     | Yes versus no                                  | 1.251      | 1.209        | 1.295        | <0.0001 |
| Other arrhythmias       | Yes versus no                                  | 1.028      | 0.996        | 1.061        | 0.0881  |
| Valvular heart disease  | Yes versus no                                  | 1.059      | 1.025        | 1.093        | 0.0005  |
| Myocardial infarction   | Yes versus no                                  | 0.988      | 0.956        | 1.022        | 0.4962  |

**Supplementary Table S6. Multivariable-adjusted negative binomial regression models for CHF-related hospitalisation in CHF patients enrolled in the cardiology care programme versus control group**  
CAD, coronary artery disease; CHF, chronic heart failure; COPD, chronic obstructive pulmonary disease; CVD, cardiovascular disease; DMP, disease management programme; DM, diabetes mellitus.

| Variables               | Interpretation                                 | Rate Ratio | Lower 95% CI | Upper 95% CI | p-value |
|-------------------------|------------------------------------------------|------------|--------------|--------------|---------|
| Group                   | Cardiology care programme versus control group | 0.761      | 0.688        | 0.841        | <0.0001 |
| Age                     | 18-40 versus 41-50 years                       | 1.794      | 0.856        | 3.759        | 0.1216  |
| Age                     | 51-60 versus 41-50 years                       | 1.013      | 0.661        | 1.553        | 0.9527  |
| Age                     | 61-70 versus 41-50 years                       | 1.147      | 0.764        | 1.722        | 0.5092  |
| Age                     | 71-80 versus 41-50 years                       | 1.518      | 1.016        | 2.269        | 0.0416  |
| Age                     | 81+ versus 41-50 years                         | 2.345      | 1.562        | 3.521        | <0.0001 |
| Sex                     | Male versus female                             | 1.287      | 1.165        | 1.422        | <0.0001 |
| German nationality      | No versus yes                                  | 1.102      | 0.930        | 1.307        | 0.2614  |
| Living in urban area    | No versus yes                                  | 1.047      | 0.955        | 1.149        | 0.3262  |
| Employed                | Yes versus no                                  | 0.732      | 0.608        | 0.882        | 0.0010  |
| State of hardship       | Yes versus no                                  | 1.442      | 1.306        | 1.592        | <0.0001 |
| In need of nursing care | Yes versus no                                  | 1.511      | 1.336        | 1.710        | <0.0001 |
| Nursing home resident   | Yes versus no                                  | 0.698      | 0.476        | 1.023        | 0.0651  |
| DMP CAD                 | Yes versus no                                  | 1.060      | 0.945        | 1.190        | 0.3179  |
| DMP DM                  | Yes versus no                                  | 1.144      | 0.994        | 1.316        | 0.0610  |
| CVD hospitalisation     | Yes versus no                                  | 1.292      | 1.158        | 1.442        | <0.0001 |
| Influenza vaccination   | No versus Yes                                  | 1.126      | 1.026        | 1.237        | 0.0126  |
| Charlson index          | Per point                                      | 1.019      | 0.993        | 1.046        | 0.1512  |
| NYHA class              | Class II versus I                              | 1.404      | 1.112        | 1.774        | 0.0044  |
| NYHA class              | Class III versus I                             | 2.821      | 2.252        | 3.533        | <0.0001 |
| NYHA class              | Class IV versus I                              | 4.875      | 3.808        | 6.241        | <0.0001 |
| NYHA class              | No NYHA class versus class I                   | 1.809      | 1.441        | 2.271        | <0.0001 |
| Diabetes mellitus       | Yes versus no                                  | 1.251      | 1.090        | 1.434        | 0.0014  |
| Hyperlipidaemia         | Yes versus no                                  | 0.889      | 0.803        | 0.984        | 0.0229  |
| Renal failure           | Yes versus no                                  | 1.591      | 1.420        | 1.782        | <0.0001 |
| COPD                    | Yes versus no                                  | 1.307      | 1.171        | 1.458        | <0.0001 |
| Pneumonia               | Yes versus no                                  | 1.052      | 0.898        | 1.233        | 0.5292  |
| Depression              | Yes versus no                                  | 0.948      | 0.849        | 1.060        | 0.3493  |
| Hypertension            | Yes versus no                                  | 0.925      | 0.766        | 1.116        | 0.4141  |
| CAD                     | Yes versus no                                  | 1.049      | 0.928        | 1.187        | 0.4456  |
| Atrial fibrillation     | Yes versus no                                  | 1.860      | 1.690        | 2.048        | <0.0001 |
| Other arrhythmias       | Yes versus no                                  | 1.092      | 0.994        | 1.199        | 0.0679  |
| Valvular heart disease  | Yes versus no                                  | 1.211      | 1.102        | 1.331        | <0.0001 |
| Myocardial infarction   | Yes versus no                                  | 1.254      | 1.113        | 1.412        | 0.0002  |

**Supplementary Table S7. Multivariable-adjusted negative binomial regression models for CAD-related hospitalisation in CAD patients enrolled in the cardiology care programme versus control group**

CAD, coronary artery disease; CHF, chronic heart failure; COPD, chronic obstructive pulmonary disease; CVD, cardiovascular disease; DMP, disease management programme; DM, diabetes mellitus.

| Variables               | Interpretation                                 | Rate Ratio | Lower 95% CI | Upper 95% CI | p-value |
|-------------------------|------------------------------------------------|------------|--------------|--------------|---------|
| Group                   | Cardiology care programme versus control group | 0.961      | 0.878        | 1.052        | 0.3866  |
| Age                     | 18-40 versus 41-50 years                       | 1.622      | 0.826        | 3.183        | 0.1601  |
| Age                     | 51-60 versus 41-50 years                       | 1.141      | 0.858        | 1.517        | 0.3636  |
| Age                     | 61-70 versus 41-50 years                       | 1.080      | 0.813        | 1.433        | 0.5957  |
| Age                     | 71-80 versus 41-50 years                       | 1.127      | 0.847        | 1.500        | 0.4117  |
| Age                     | 81-90 versus 41-50 years                       | 1.165      | 0.863        | 1.573        | 0.3180  |
| Age                     | 91+ versus 41-50 years                         | 0.968      | 0.553        | 1.695        | 0.9087  |
| Sex                     | Male versus female                             | 1.082      | 0.985        | 1.189        | 0.1002  |
| German nationality      | No versus yes                                  | 1.204      | 1.062        | 1.365        | 0.0036  |
| Living in urban area    | No versus yes                                  | 0.936      | 0.860        | 1.020        | 0.1313  |
| Employed                | Yes versus no                                  | 0.931      | 0.803        | 1.078        | 0.3369  |
| State of hardship       | Yes versus no                                  | 1.383      | 1.260        | 1.519        | <0.0001 |
| In need of nursing care | Yes versus no                                  | 0.860      | 0.741        | 0.997        | 0.0458  |
| Nursing home resident   | Yes versus no                                  | 0.270      | 0.101        | 0.719        | 0.0088  |
| DMP CAD                 | Yes versus no                                  | 1.172      | 1.067        | 1.287        | 0.0009  |
| DMP DM                  | Yes versus no                                  | 0.953      | 0.836        | 1.086        | 0.4702  |
| CVD hospitalisation     | Yes versus no                                  | 1.613      | 1.467        | 1.775        | <0.0001 |
| Influenza vaccination   | No versus yes                                  | 1.041      | 0.954        | 1.136        | 0.3673  |
| Charlson index          | Per point                                      | 1.035      | 1.010        | 1.060        | 0.0050  |
| Diabetes mellitus       | Yes versus no                                  | 1.260      | 1.106        | 1.434        | 0.0005  |
| Hyperlipidaemia         | Yes versus no                                  | 1.273      | 1.145        | 1.416        | <0.0001 |
| Renal failure           | Yes versus no                                  | 1.057      | 0.939        | 1.189        | 0.3591  |
| COPD                    | Yes versus no                                  | 1.097      | 0.984        | 1.222        | 0.0945  |
| Pneumonia               | Yes versus no                                  | 1.143      | 0.959        | 1.364        | 0.1357  |
| Depression              | Yes versus no                                  | 1.070      | 0.967        | 1.184        | 0.1927  |
| Hypertension            | Yes versus no                                  | 0.982      | 0.837        | 1.152        | 0.8222  |
| CHF                     | Yes versus no                                  | 0.952      | 0.863        | 1.049        | 0.3186  |
| Atrial fibrillation     | Yes versus no                                  | 0.844      | 0.758        | 0.940        | 0.0020  |
| Other arrhythmias       | Yes versus no                                  | 0.876      | 0.796        | 0.965        | 0.0070  |
| Valvular heart disease  | Yes versus no                                  | 0.926      | 0.841        | 1.019        | 0.1155  |
| Myocardial infarction   | Yes versus no                                  | 1.536      | 1.401        | 1.683        | <0.0001 |
